# Supplementary material for: Green Synthesis of Fluorescent Ag Nanoclusters for Detecting Cu2+ Ions and Its “Switch-On” Sensing Application for GSH
Source: Hindawi journal article supplement (doi:10.1155/2021/8829654), 2021-03-13
Supplement: f1 [file 8829654.f1.docx]

# Green synthesis of fluorescent Ag nanoclusters for detecting Cu2+ ions and its “Switch-on” sensing application for GSH

School of Science, Jiangnan University, Wuxi, China

Correspondence should be addressed to Guoqing Chen; jncgq@jiangnan.edu.cn

Table S1: The fluorescent lifetime of the Ag NCs.

|  |  |  |  |
| --- | --- | --- | --- |
| 1.13ns | 3.98ns | 8.25ns | 1.103 |
| 13.87% | 51.57% | 34.56% |


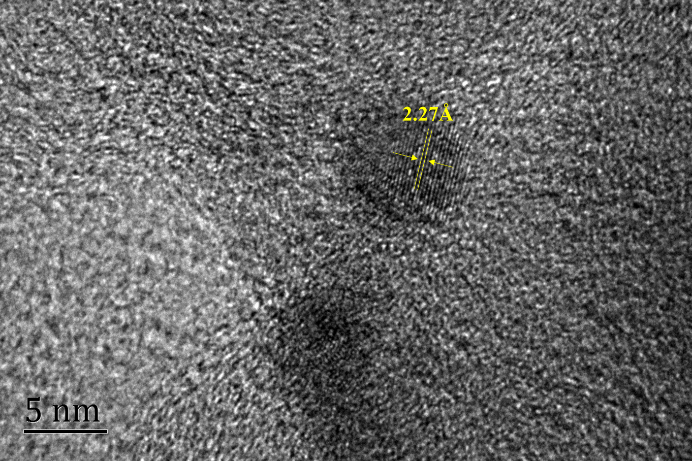


Figure S1: The HR-TEM image of the Ag NCs. The yellow line label the lattice distance of the Ag NCs.


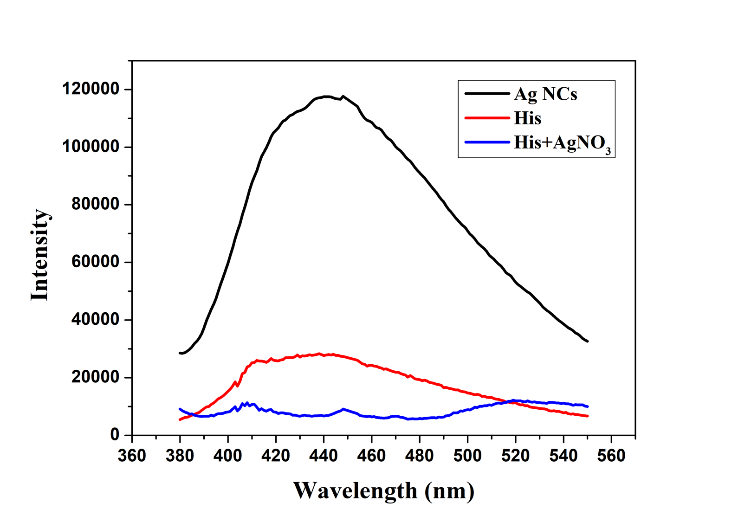


Figure S2: Fluorescence spectrum of His solution (red), solution mixed with His and AgNO3 (blue) and Ag NCs solution (black) excited at 365nm.


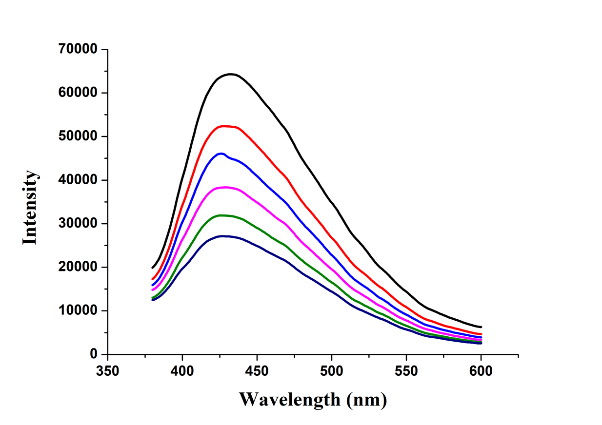


Figure S3: Fluorescence response of the Ag NCs upon addition of diﬀerent concentrations of Cu2+ from top to bottom: 0, 1 mM, 2 mM, 4 mM, 6 mM, 8 mM.


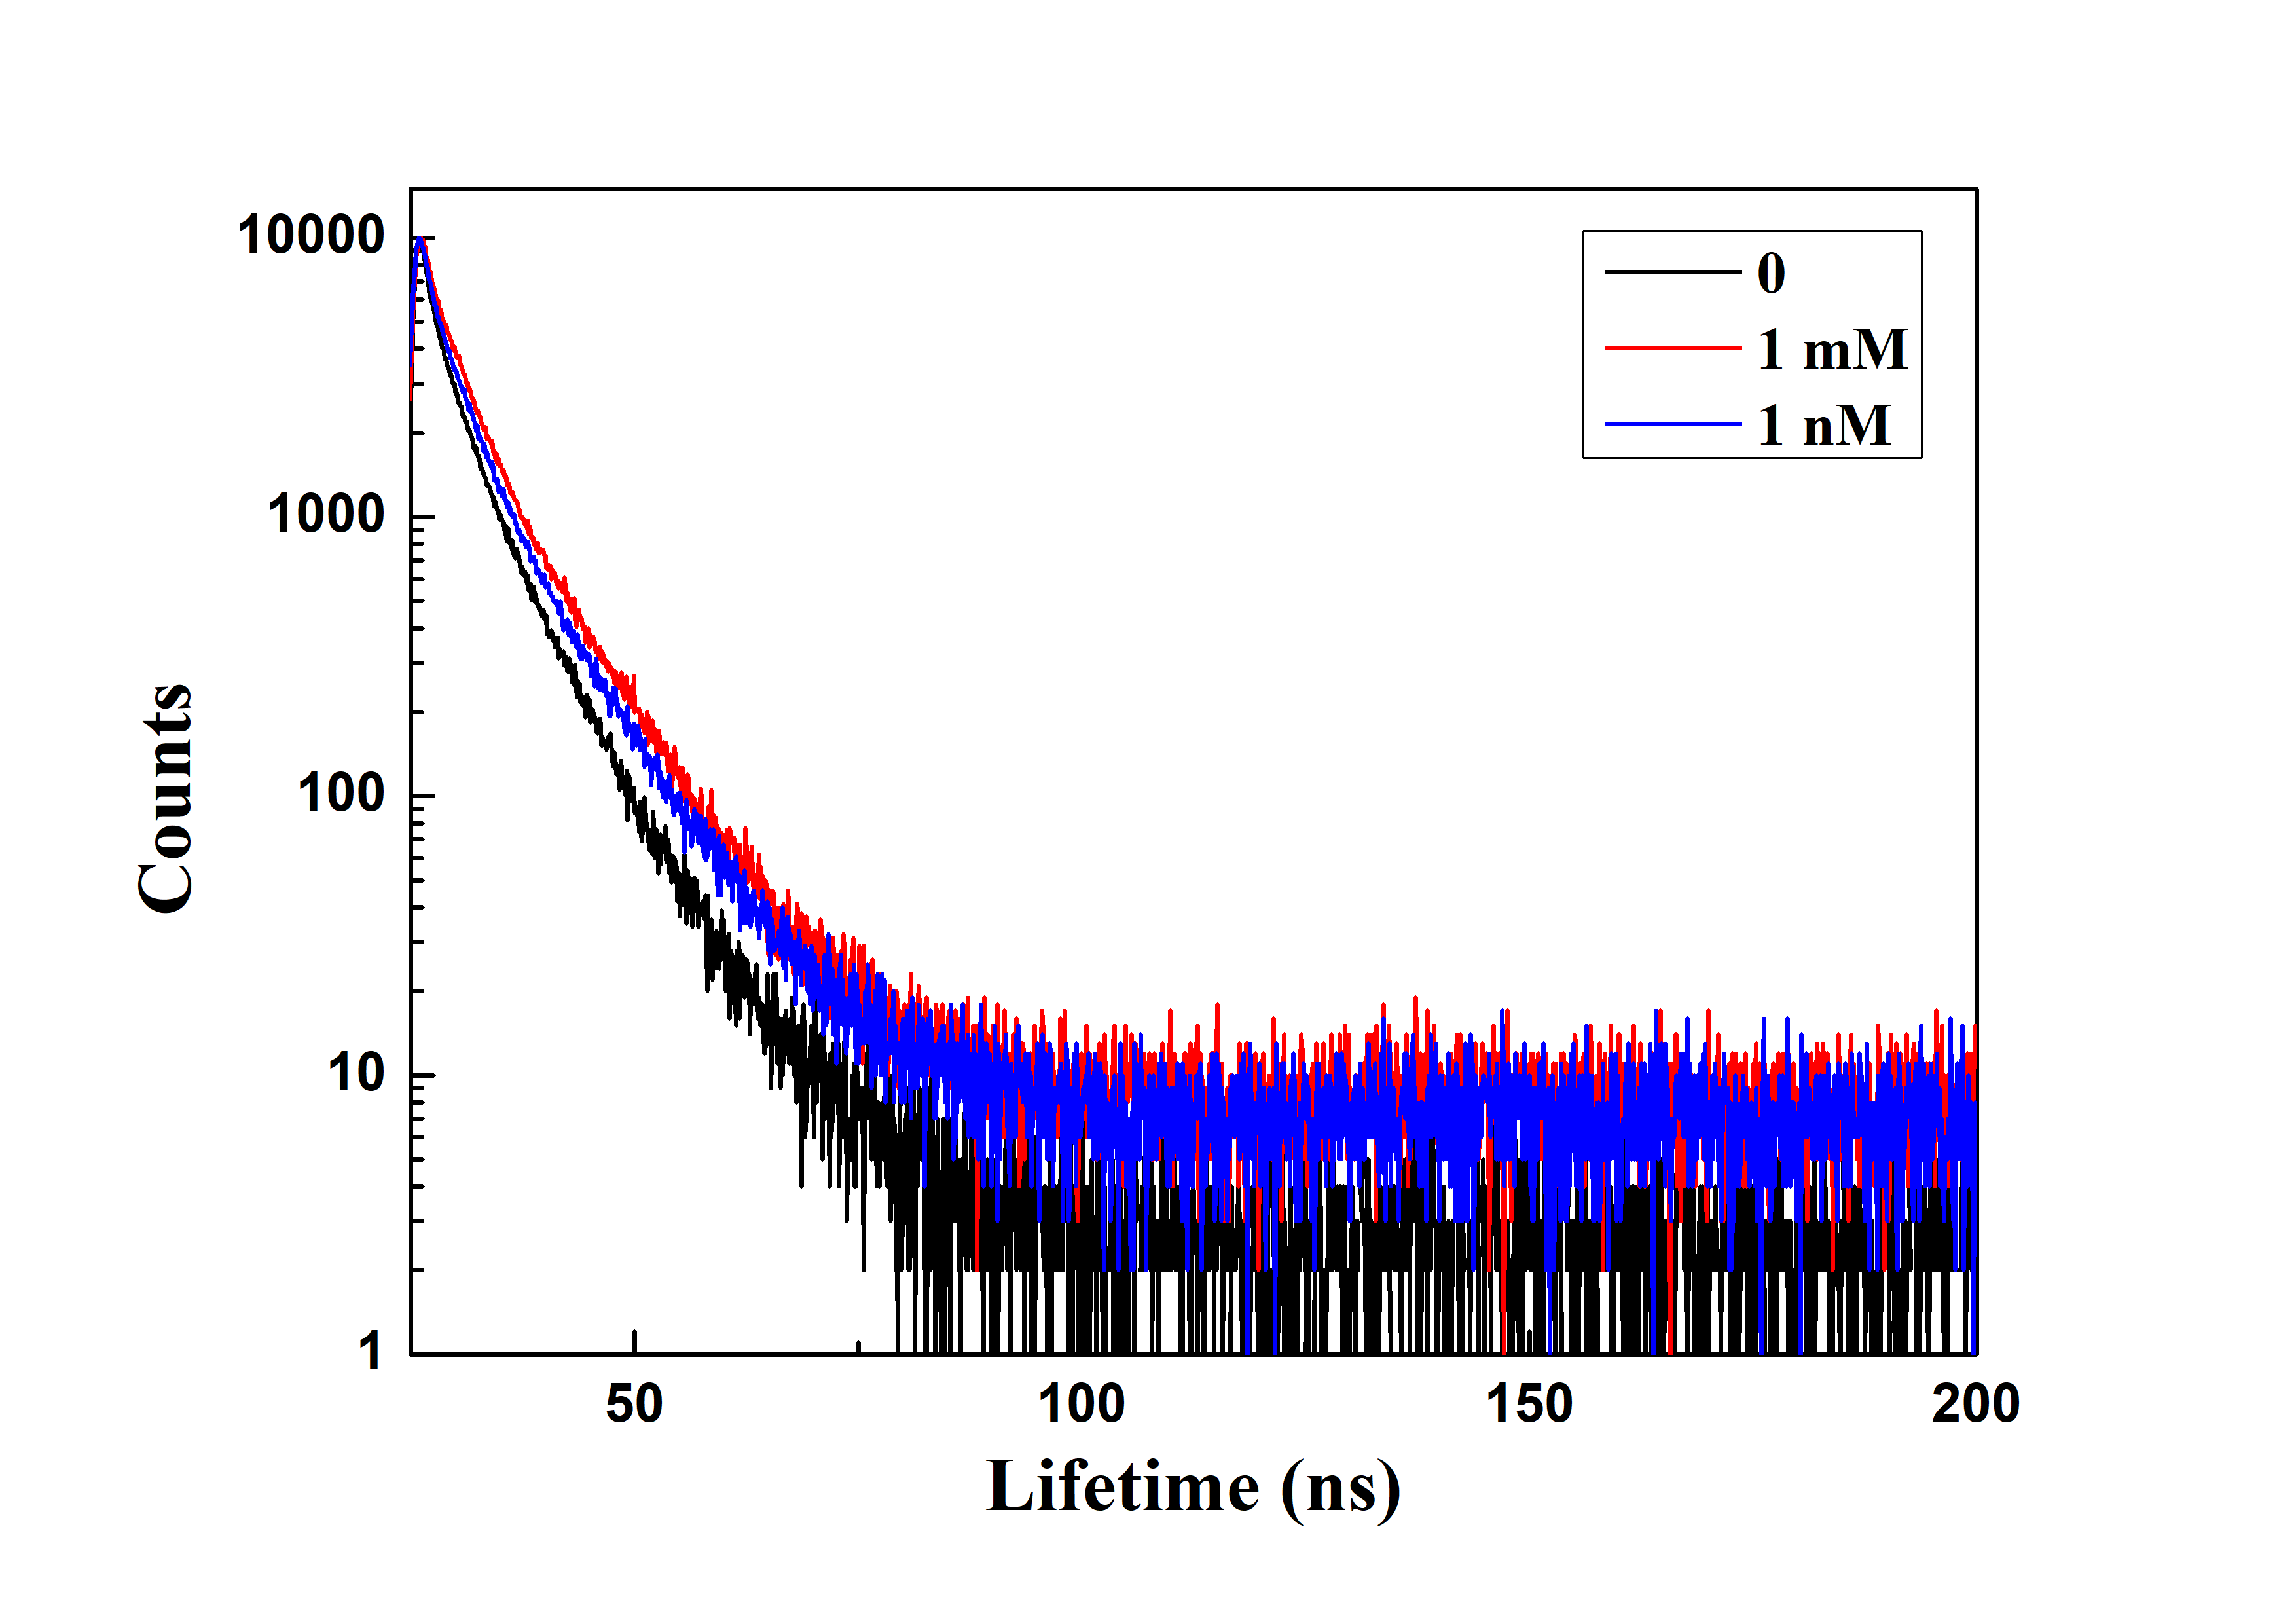


Figure S4: Time-resolved fluorescence spectrum of the Ag NCs upon addition of diﬀerent concentrations of Cu2+: 0,1 mM,1 nM.


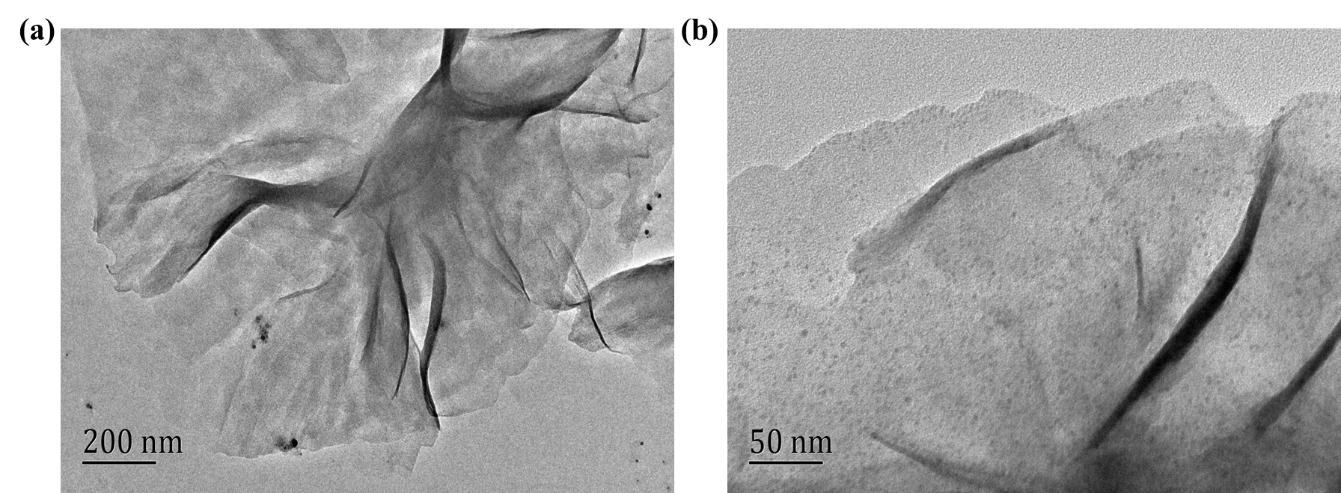


Figure S5: TEM images of the Ag NCs in the presence of Cu2+ (a)1 mM. (b)1 nM.
